# Supplementary material
Source: PubMed Central journal article supplement (PMC5532740)

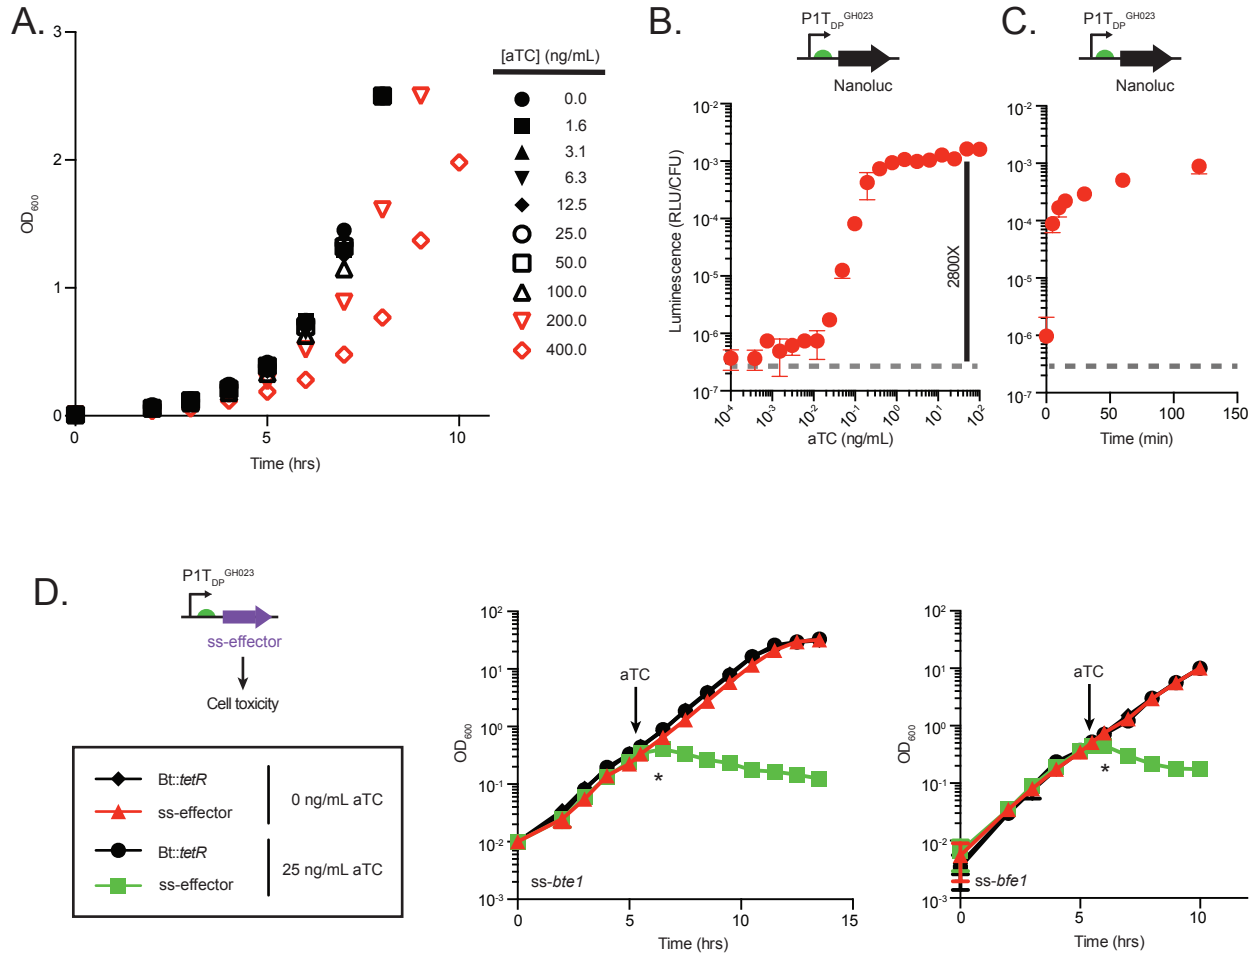

Figure S1. Related to Figure 2 and Figure 3.

Supplement: NIHMS864433-supplement-supp_fig_1.pdf [file NIHMS864433-supplement-supp_fig_1.pdf]

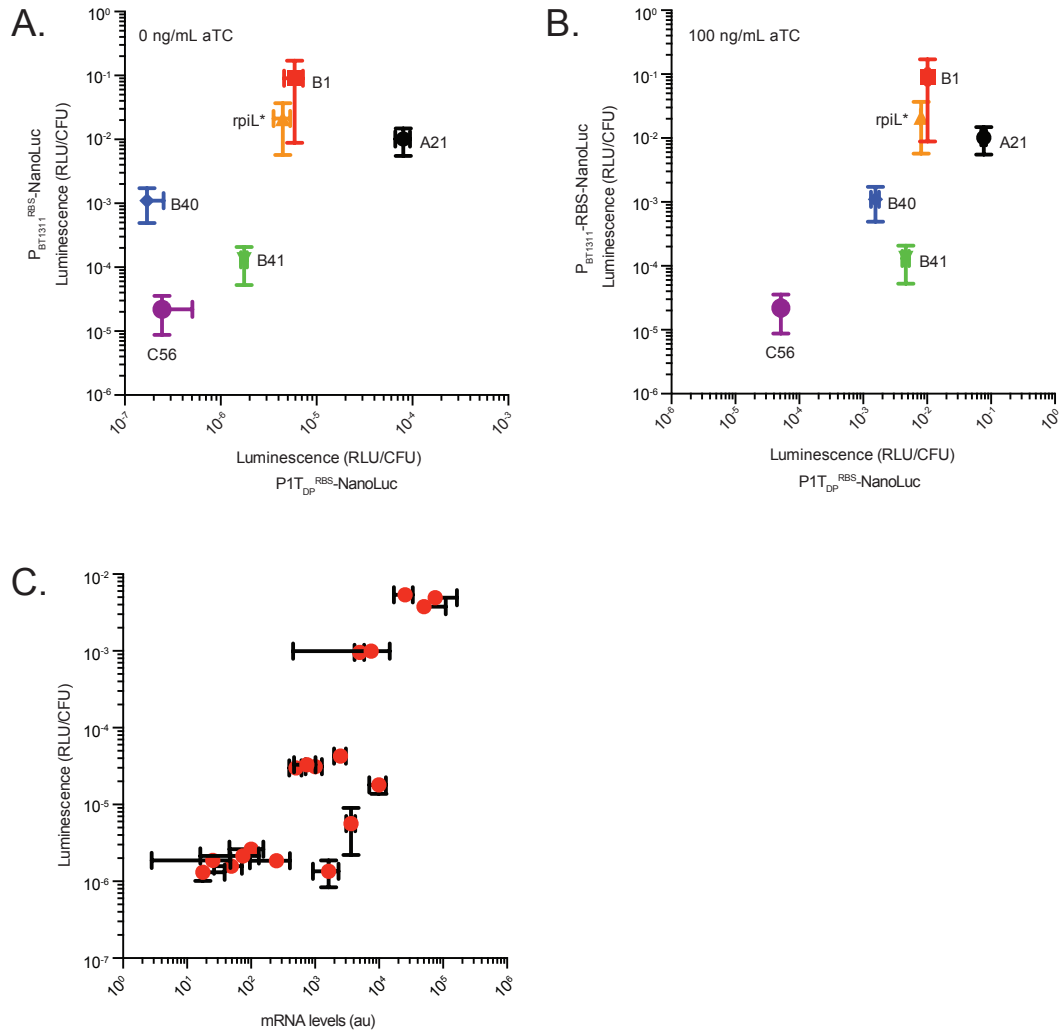

Figure S2. Related to Figure 4.

Supplement: NIHMS864433-supplement-supp_fig_2.pdf [file NIHMS864433-supplement-supp_fig_2.pdf]

A.

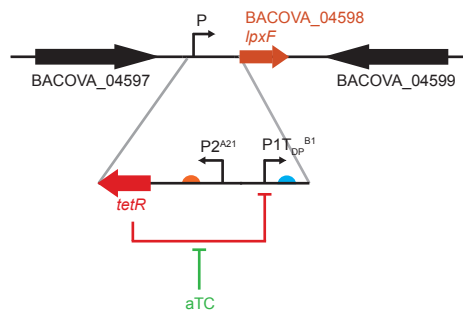

B.

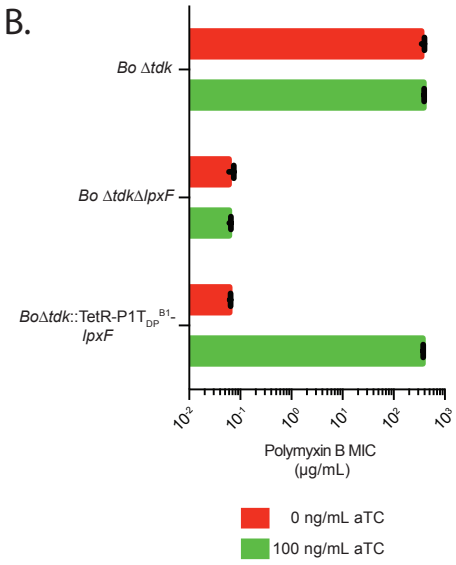

Figure S3. Related to Figure 5.

Supplement: NIHMS864433-supplement-supp_fig_3.pdf [file NIHMS864433-supplement-supp_fig_3.pdf]

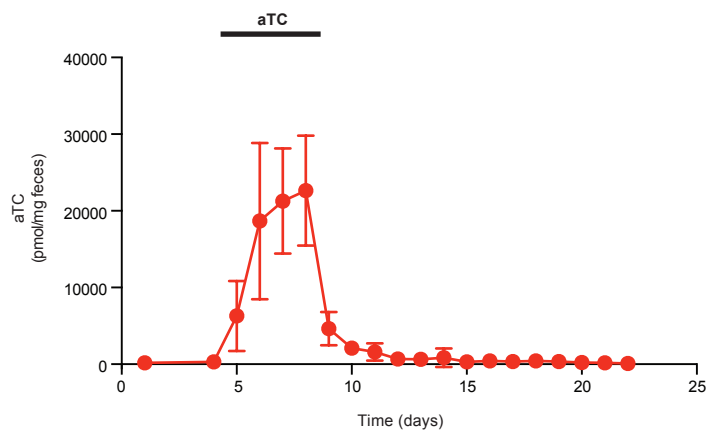

Figure S4. Related to Figure 6.

Supplement: NIHMS864433-supplement-supp_fig_4.pdf [file NIHMS864433-supplement-supp_fig_4.pdf]

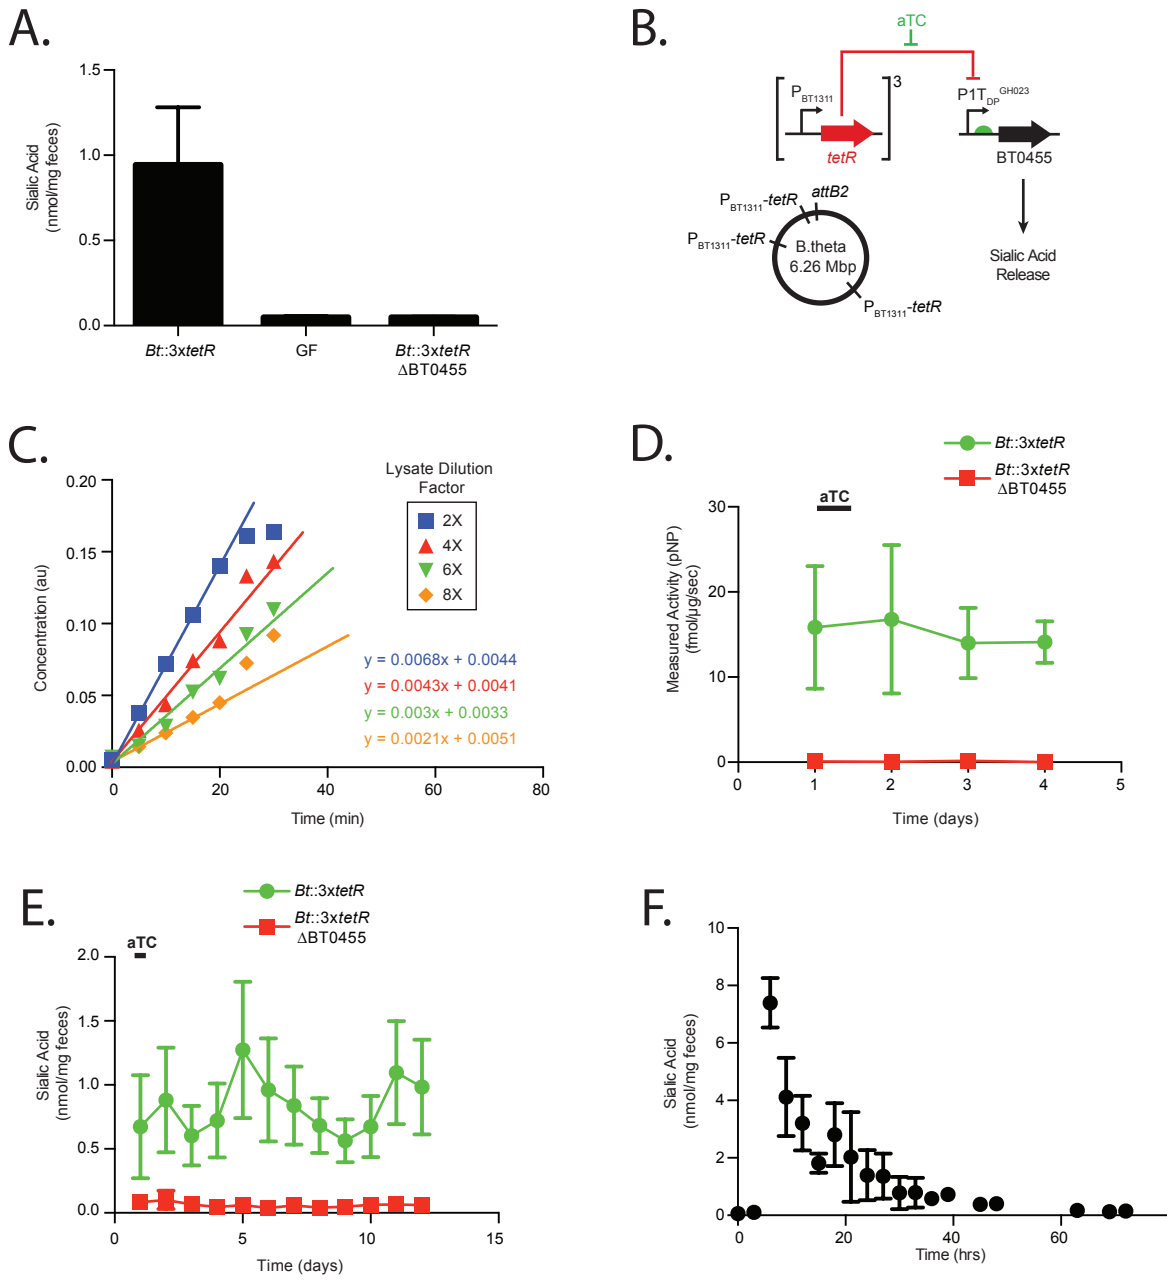

Figure S6. Related to Figure 7.

Supplement: NIHMS864433-supplement-supp_fig_5.pdf [file NIHMS864433-supplement-supp_fig_5.pdf]

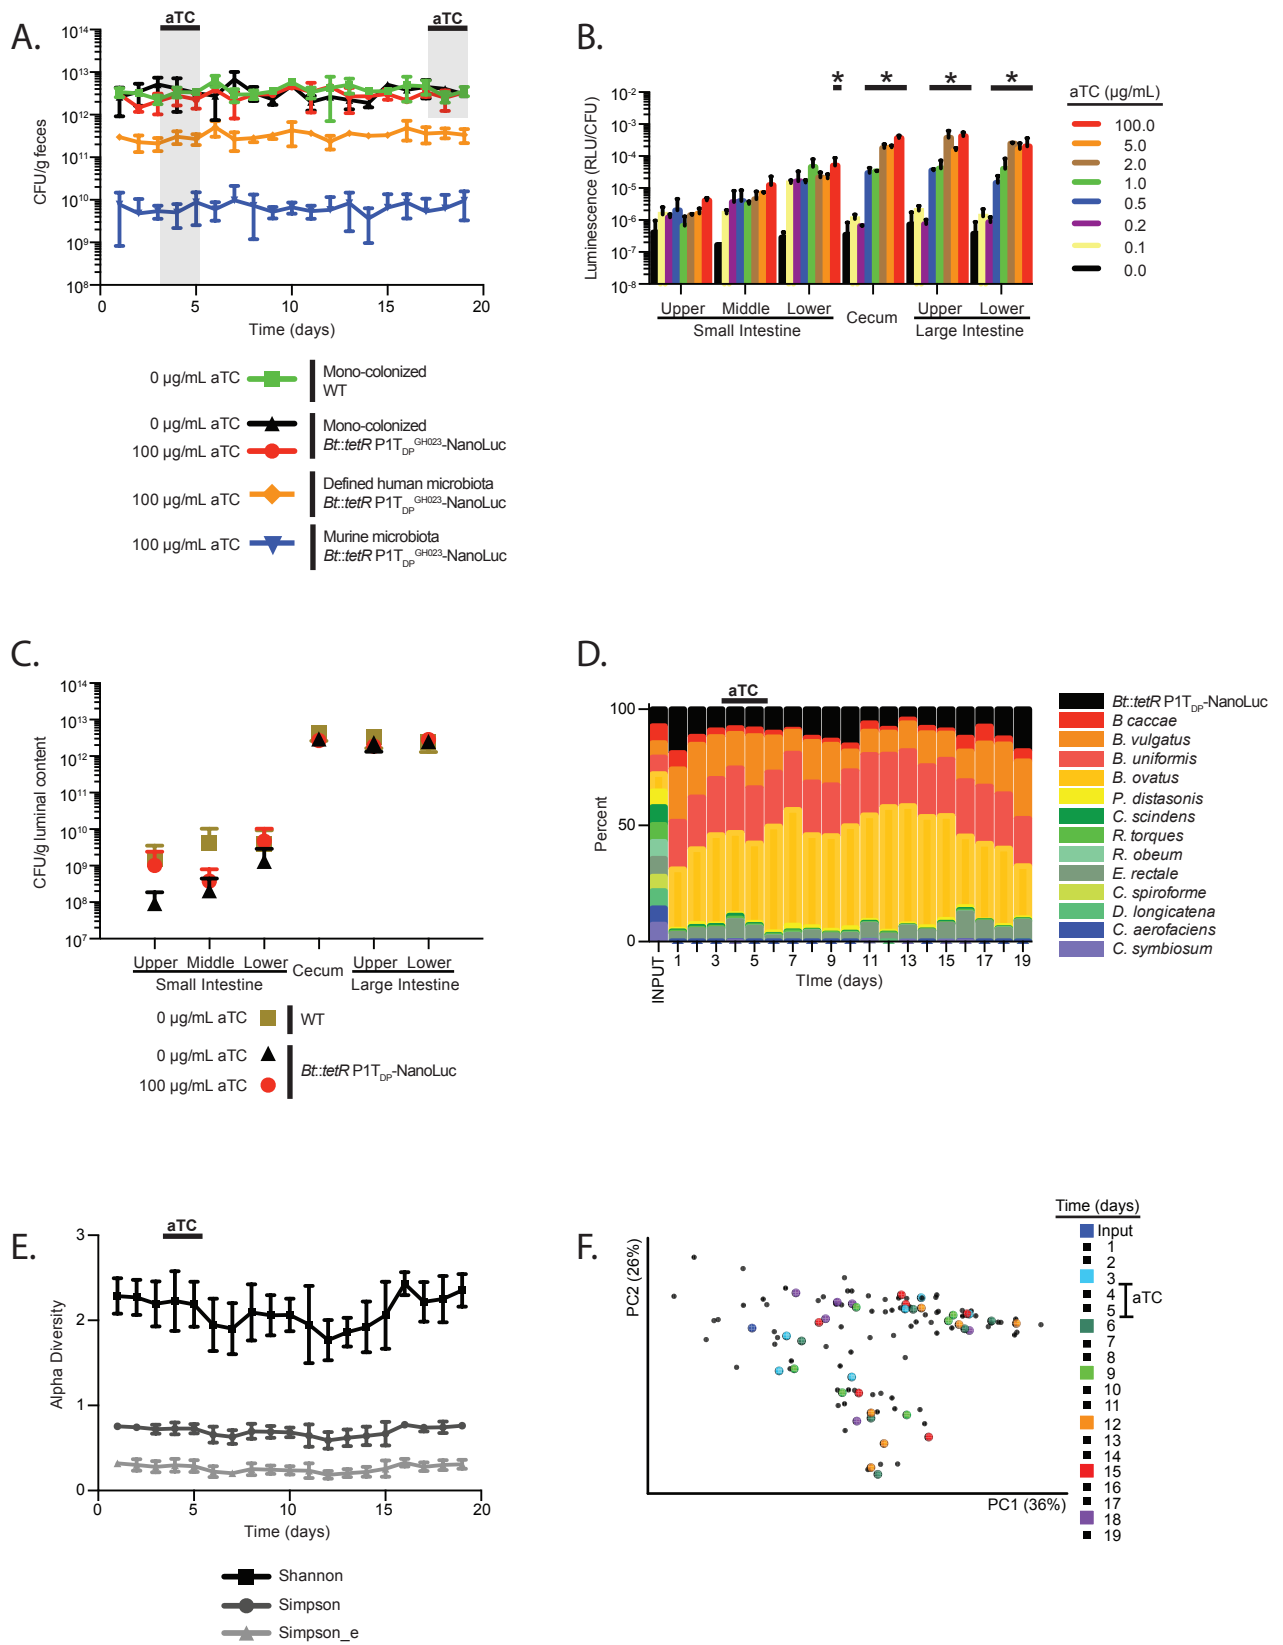

Figure S5. Related to Figure 6.

Supplement: NIHMS864433-supplement-supp_fig_6.pdf [file NIHMS864433-supplement-supp_fig_6.pdf]

Figure 7.

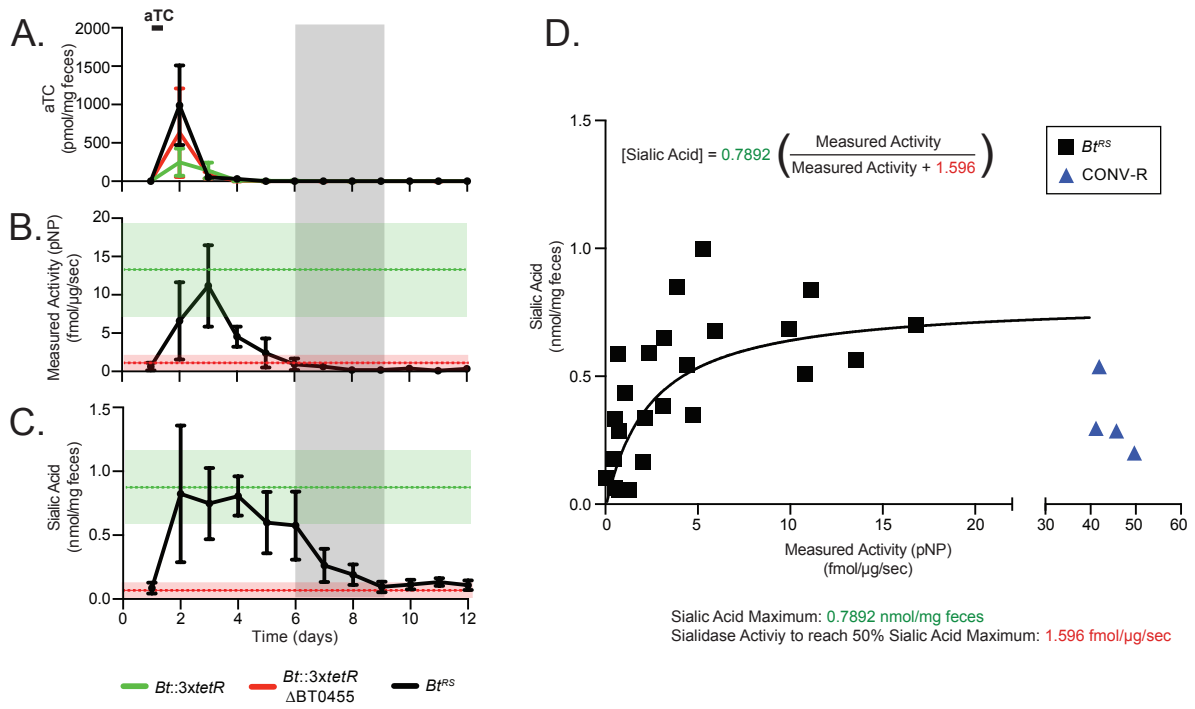

Supplement: NIHMS864433-supplement-supp_fig_7.pdf [file NIHMS864433-supplement-supp_fig_7.pdf]
